# Supplementary material for: Osteolytic effects of tumoral estrogen signaling in an estrogen receptor-positive breast cancer bone metastasis model
Source: PubMed Central journal article supplement (PMC8594878; doi:10.20517/2394-4722.2021.27), 2021-04-08
Supplement: NIHMS1747926-supplement-Supplementary_Figure_1.pdf [file NIHMS1747926-supplement-Supplementary_Figure_1.pdf]

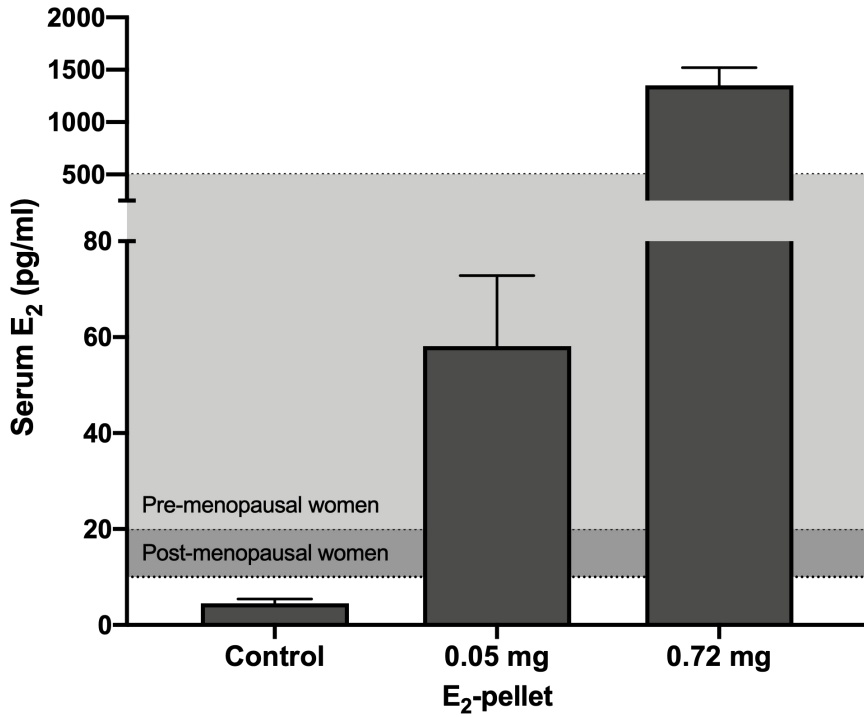

**Supplemental Figure 1. Circulating E<sub>2</sub> levels in E<sub>2</sub>-supplemented mice.** Serum E<sub>2</sub> levels in naïve mice vs E<sub>2</sub> (0.72 mg 60-day pellet)-supplemented mice, 14 days post placement of pellets at 4 weeks of age. Assay limit of detection = 0.01 nM. Typical E<sub>2</sub> levels in pre-menopausal (20-500 pg/ml) and post-menopausal (10-20 pg/ml) women are indicated by shading for comparison[90].
