# Supplementary material for: Osteolytic effects of tumoral estrogen signaling in an estrogen receptor-positive breast cancer bone metastasis model
Source: PubMed Central journal article supplement (PMC8594878; doi:10.20517/2394-4722.2021.27), 2021-04-08
Supplement: NIHMS1747926-supplement-Supplementary_Figure_2.pdf [file NIHMS1747926-supplement-Supplementary_Figure_2.pdf]

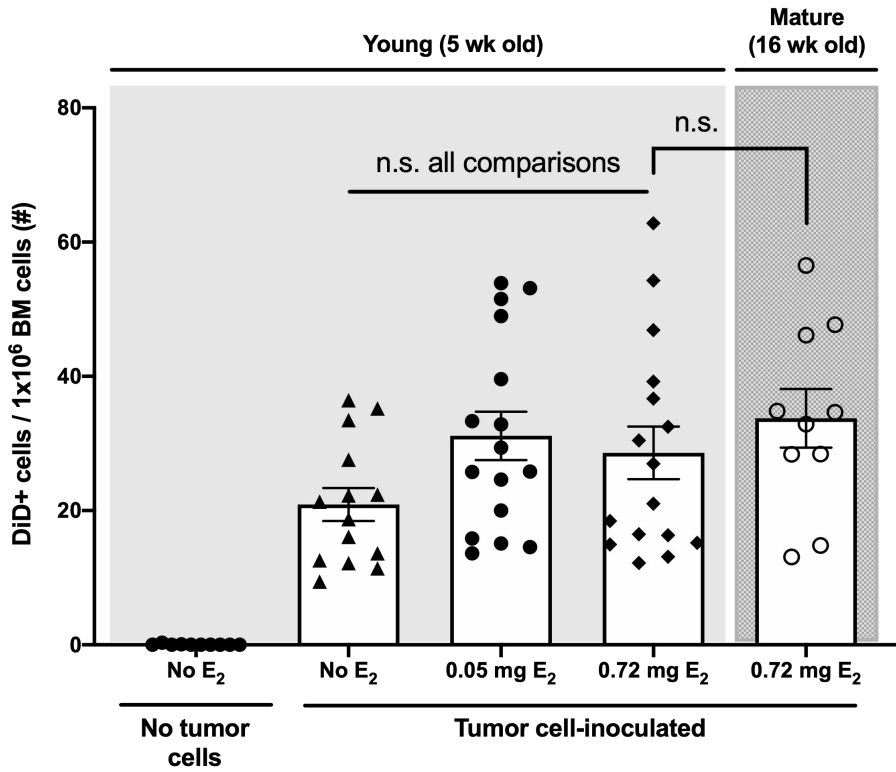

**Supplemental Figure 2. E<sub>2</sub> effects on ER+ tumor cell seeding of bone.** Quantification of tumor cells detected in proximal tibiae of E<sub>2</sub>-supplemented mice (young or mature, as indicated) vs. mice with no E<sub>2</sub> supplementation, inoculated with DiD-labeled ER+ tumor cells. There were no significant differences (n.s.) in DiD+ tumor cell number in young mice with or without E<sub>2</sub>, between E<sub>2</sub> doses (0.05 vs. 0.72 mg) in young mice, or between young and mature mice treated with 0.72 mg E<sub>2</sub>, as tested by one-way ANOVA with Sidak's post-test (n=10-16/group). DiD+ cells were not detected in naïve mice lacking E<sub>2</sub>-supplementation and tumor inoculation (n=10)
